# Supplementary material for: Strategies for Metagenomic-Guided Whole-Community Proteomics of Complex Microbial Environments
Source: PLoS One. 2011 Nov 23;6(11):e27173. doi: 10.1371/journal.pone.0027173 (PMC3223167; doi:10.1371/journal.pone.0027173)
Supplement: Table S1 — Metagenomic sequencing metrics. (XLS) [file pone.0027173.s002.xls]

## Sheet: Sheet1
Metagenome	LC Prep	DNA Extraction	Total Reads	Total KiloBP	Avg Read Length
15a	1	MoBio	563893	220685	391
15b	1	MoBio	550360	204845	372
16a	1	MoBio	585262	229389	392
16b	1	MoBio	418759	147547	352
18a	1	MoBio	627543	221475	353
18b	1	MoBio	424935	142718	336
6a	1	MoBio	1079211	403882	374
6b	1	MoBio	584264	220354	377
6b	2	MoBio	599107	188577	315
