# Supplementary material for: Strategies for Metagenomic-Guided Whole-Community Proteomics of Complex Microbial Environments
Source: PLoS One. 2011 Nov 23;6(11):e27173. doi: 10.1371/journal.pone.0027173 (PMC3223167; doi:10.1371/journal.pone.0027173)
Supplement: Table S3 — False discovery rates for sample 6b (Run 1) against six different metagenomic-predicted sequence databases. The database results were filtered at a 1-peptide level with and without high mass accuracy. (XLS) [file pone.0027173.s004.xls]

## Sheet: Sheet1
Sample	Database (Forward/Reverse)	Total Identified Forward		% of Forward Identified		Total Identified Reverse Peptides		False Discovery Rate
		<±10 ppm	>±10 ppm	<±10 ppm	>±10 ppm	<±10 ppm	>±10 ppm	Total FP	FP <±10 ppm
6b, Run1	RM	19589	8747	0.6913	0.3087	321	4551	0.2934	0.0193
	RFM	18229	8375	0.6852	0.3148	320	4648	0.3147	0.0203
	CAFM	17443	7676	0.6944	0.3056	277	4094	0.2964	0.0188
	KG	20059	7672	0.7233	0.2767	256	3419	0.234	0.0163
	NM+KG	23881	8709	0.7328	0.2672	256	3603	0.2117	0.014
	RMPS	27218	8722	0.7573	0.2427	228	2917	0.1609	0.0117
