# Supplementary material for: Strategies for Metagenomic-Guided Whole-Community Proteomics of Complex Microbial Environments
Source: PLoS One. 2011 Nov 23;6(11):e27173. doi: 10.1371/journal.pone.0027173 (PMC3223167; doi:10.1371/journal.pone.0027173)
Supplement: Table S4 — False discovery rates for sample 6b (Run 1) against six different metagenomic-predicted sequence databases. The database results were filtered at a 2-peptide level with and without high mass accuracy. (XLS) [file pone.0027173.s005.xls]

## Sheet: HMP_Sample6b_Recalibrated_FDR.t
Sample	Database (Forward/Reverse)	Total Identified Forward		% of Forward Identified		Total Identified Reverse		False Discovery Rate
		<±10 ppm	>±10 ppm	<±10 ppm	>±10 ppm	<±10 ppm	>±10 ppm	Total FP	FP <±10 ppm
6b, Run1	RM	15363	3523	0.8135	0.1865	27	310	0.0351	0.0028
	RFM	13971	3057	0.8205	0.1795	33	328	0.0415	0.0038
	CAFM	13783	2902	0.8261	0.1739	16	291	0.0361	0.0019
	KG	16840	3695	0.8201	0.1799	15	248	0.0253	0.0014
	NM+KG	19898	4320	0.8216	0.1784	11	255	0.0217	0.0009
