# Supplementary material for: Strategies for Metagenomic-Guided Whole-Community Proteomics of Complex Microbial Environments
Source: PLoS One. 2011 Nov 23;6(11):e27173. doi: 10.1371/journal.pone.0027173 (PMC3223167; doi:10.1371/journal.pone.0027173)
Supplement: Table S5 — Distribution of RFM_KG assigned PSMs for 6a (Run 2 and 3) and 6b (Run1 and 2). The assigned PSMs were distributed into three different categories: RFM only, KG only, and RFM plus KG based on their sequence uniqueness to each set of sequences. If a PSM was unique to protein sequences in RFM, but was not present in KG, the PSM was classified and categorized as RFM only and vice versa. If a PSM was found to match a protein in both, RFM and KG, the PSM was categorized as a shared spectrum. (XLS) [file pone.0027173.s006.xls]

## Sheet: Similarities_Summary_of_DB_Over
RFM_KG Database
Sample	RFM Only			Kurokawa & Gill (KG) Only			RFM and KG			Total Assigned Spectra
	Unique Spectra	% of RFM & KG Spectra	% of Total Spectra	Unique Spectra	% of RFM & KG Spectra	% of Total Spectra	Shared Spectra	% of RFM & KG Spectra	% of Total Spectra
6a, Run 2	8012	0.3433	0.3035	1454	0.0623	0.0551	13869	0.5943	0.5253	26403
6a, Run 3	6995	0.312	0.2773	1341	0.0598	0.0532	14085	0.6282	0.5584	25223
6b, Run 1	5651	0.2709	0.2364	2431	0.1165	0.1017	12779	0.6126	0.5346	23902
6b, Run 2	5595	0.2829	0.2393	2149	0.1086	0.0919	12036	0.6085	0.5148	23378
Runs Averaged	6563.25	0.302275	0.264125	1843.75	0.0868	0.075475	13192.2	0.6109	0.533275	24726.5
