# Supplementary material for: Strategies for Metagenomic-Guided Whole-Community Proteomics of Complex Microbial Environments
Source: PLoS One. 2011 Nov 23;6(11):e27173. doi: 10.1371/journal.pone.0027173 (PMC3223167; doi:10.1371/journal.pone.0027173)
Supplement: Table S6 — False discovery rates for sample 6b (Run 1 and 2) against the RMPS database. An initial ≥1-peptide, deltCN 0.0, and high mass accuracy (±10 ppm) filter were applied to the read-based identifications followed by a ≥2-peptide/protein post-database mapping filter. (XLS) [file pone.0027173.s007.xls]

## Sheet: Sheet1
Sample	Total Peptides	Non-redundant Peptides	Total Identified Forward Peptides	Non-redundant Forward Peptides	Total Identified Reverse Peptides	Non-redundant Reverse Peptides	Total FDR (%)	Non-redundant FDR (%)
6b, Run 1	5500	3765	5498	3763	2	2	0.0727273	0.106242
6b, Run 2	5325	3538	5316	3535	9	3	0.338028	0.169587
